# Supplementary material for: Functional variations among LOV domains as revealed by FT-IR difference spectroscopy
Source: Royal Society of Chemistry journal article supplement (doi:10.1039/b400976b), 2004-06-01
Supplement: b400976b.doc [file b400976b.doc]

**
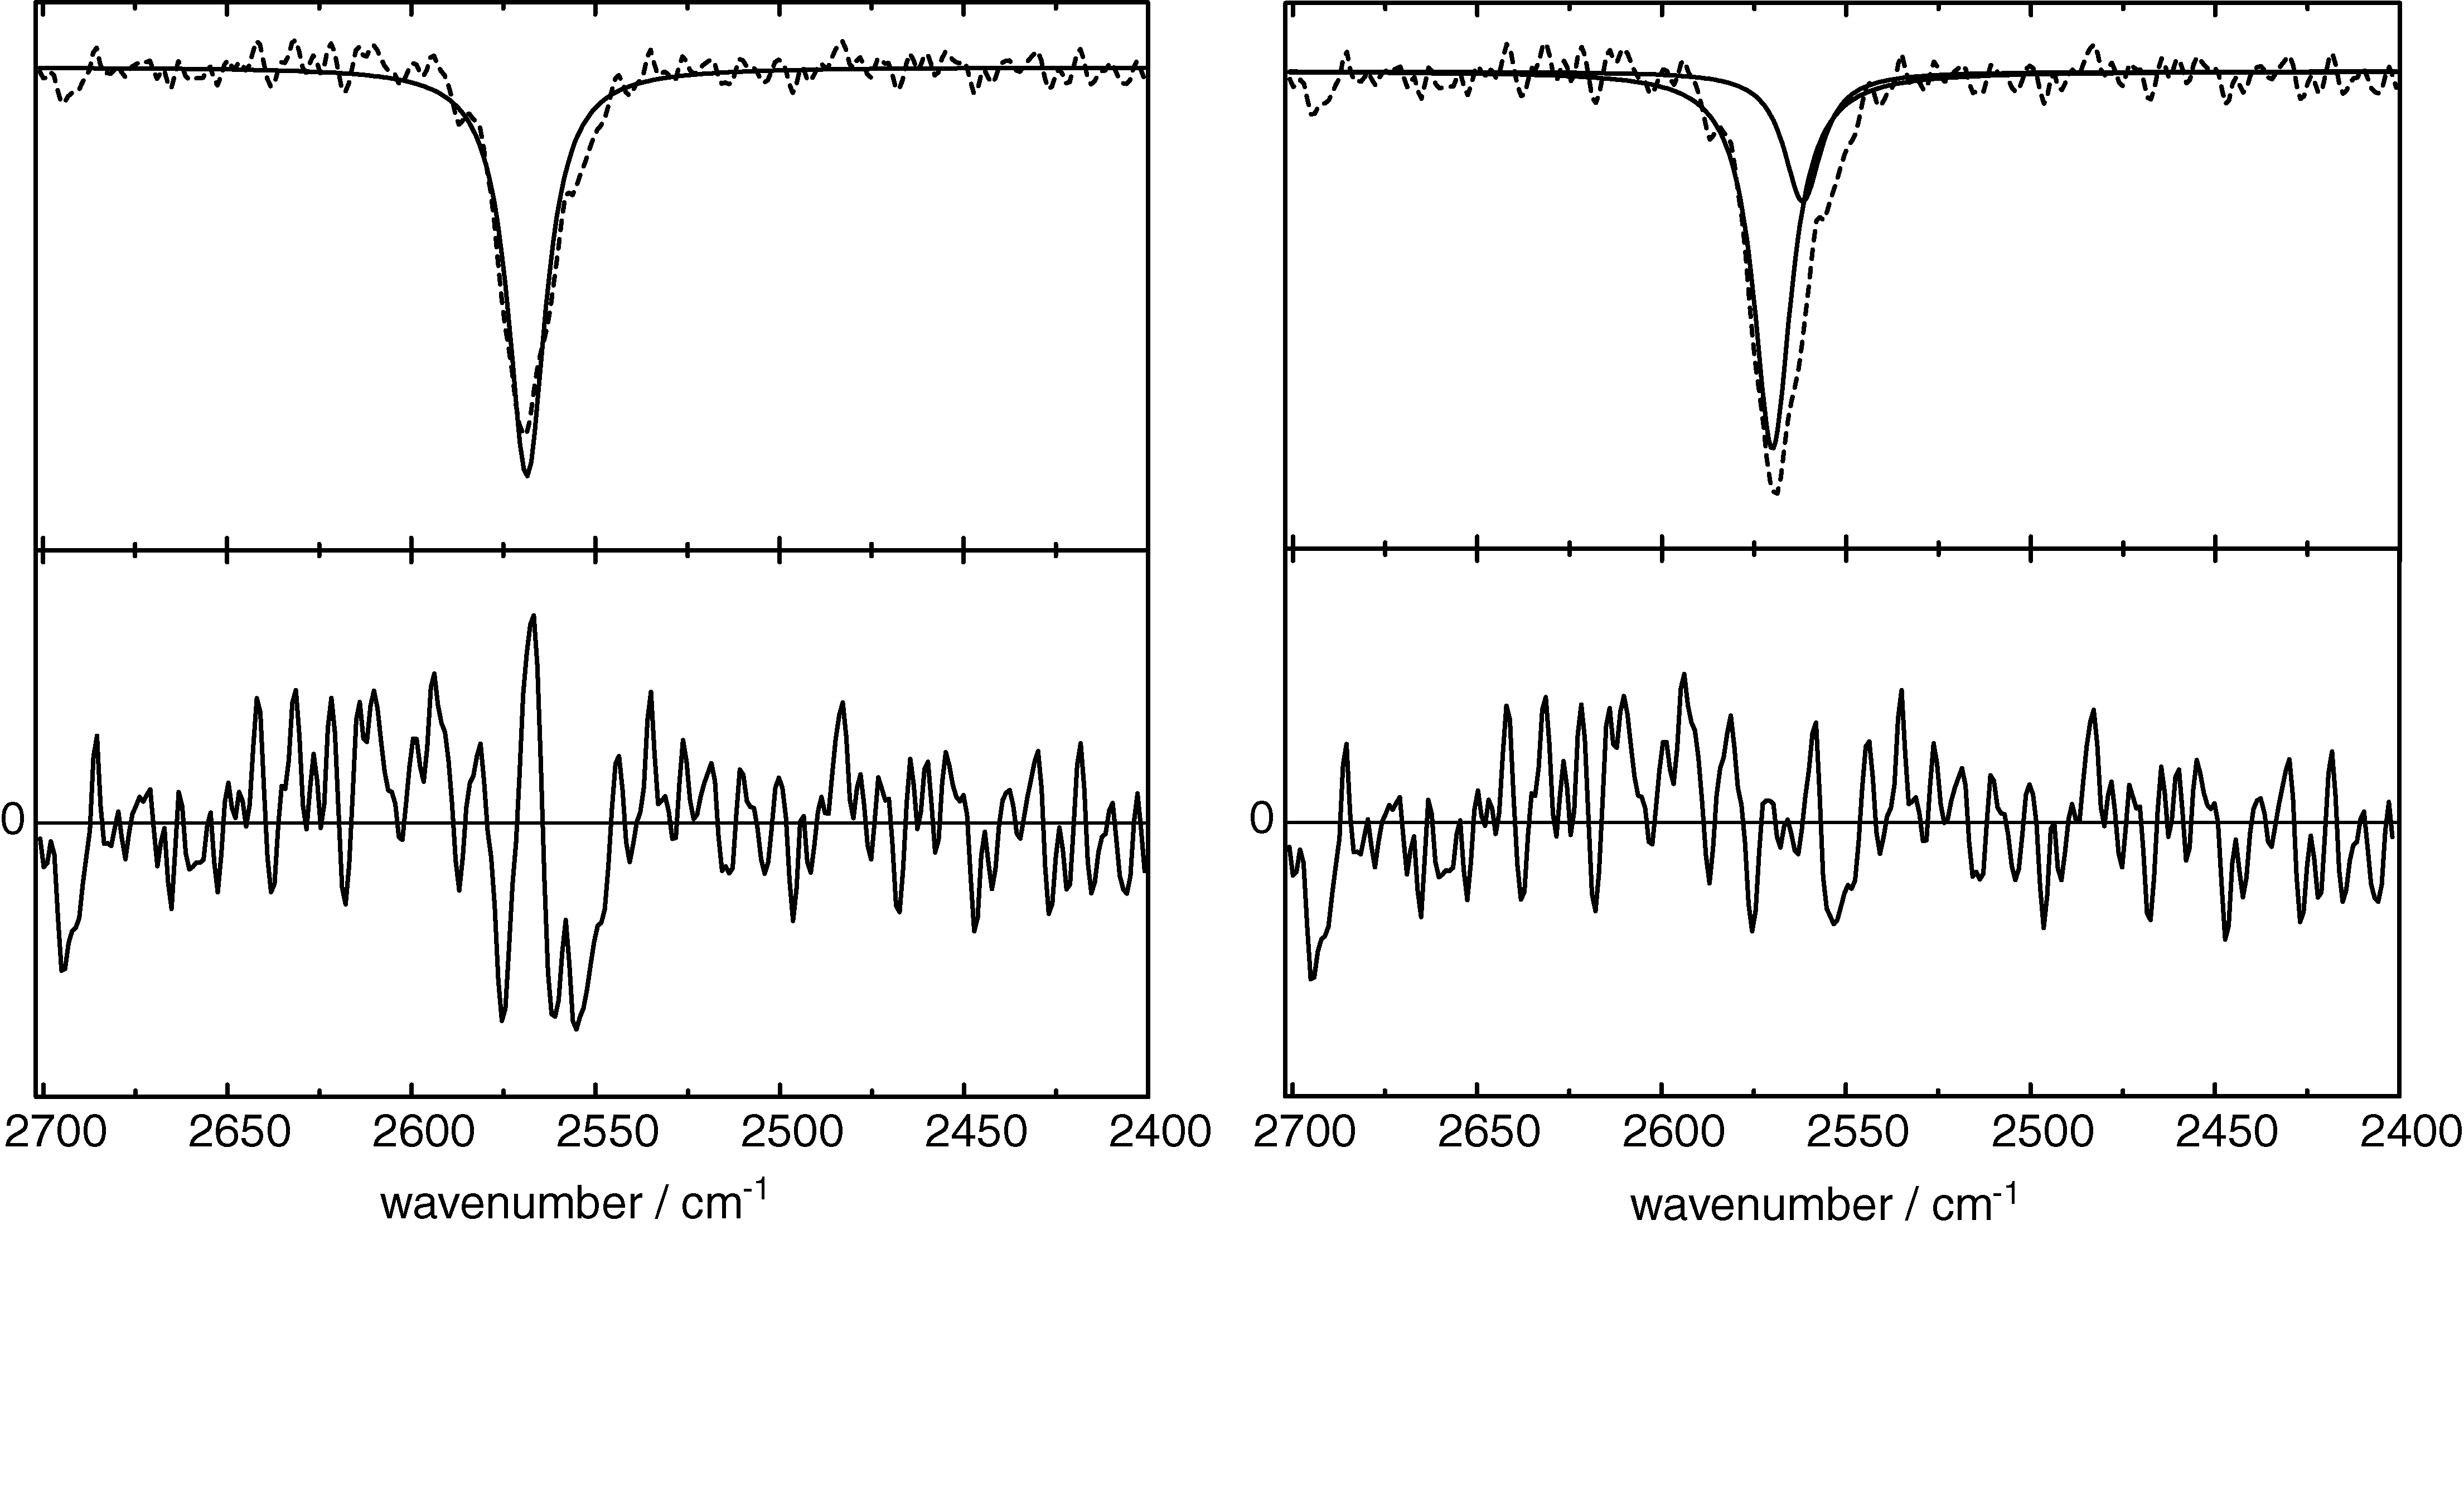
**

**Fig S1:** (Top) Lorentzian fitting to the IR difference spectrum of LOV1 in the S‑H stretching region. Solid lines indicate the fit with one (left panel) and with the sum of two Lorentzians (right). (Bottom) Residuals of the fits magnified by a factor of 6.5.
